# Supplementary material for: Pregnancy-associated stroke –a systematic review of subsequent pregnancies and maternal health
Source: PubMed Central journal article supplement (PMC6540366; doi:10.1186/s12884-019-2339-y), 2019-05-28
Supplement: 12884_2019_2339_MOESM1_ESM.pdf [file 12884_2019_2339_MOESM1_ESM.pdf]

## Additional File 1: Detailed search strategy

PubMed and Ovid Medline were searched in early September and CINAHL and Cochrane Library in early October 2018 with the following strategies:

### PubMed

Search (((((((((((((((((((("stroke") OR "cerebrovascular disorders") OR "intracerebral hemorrhage") OR "subarachnoid hemorrhage")) OR "ischemic stroke") OR "cerebral venous thrombosis") OR "intracranial thrombosis") OR "sagittal sinus thrombosis")) OR ("intracranial embolism and thrombosis") OR "transient ischemic attack")) AND (((("pregnancy") OR "pregnancy complications") OR "puerperal disorders") OR "postpartum period") OR "pregnancy complications cardiovascular")) AND (((("follow up studies") OR "recurrence") OR "pregnancy outcome")) AND "adult")) AND "english"[Language] Sort by: Title

The search yielded 268 articles.

### Ovid Medline

- 1 exp STROKE/ or exp STROKE, LACUNAR/ (116819)
- 2 exp Cerebrovascular Disorders/ (337018)
- 3 exp Cerebral Hemorrhage/ (31876)
- 4 exp Subarachnoid Hemorrhage/ (19779)
- 5 exp Intracranial Thrombosis/ or exp Sinus Thrombosis, Intracranial/ or exp "Intracranial Embolism and Thrombosis"/ or exp Cerebral Veins/ (23441)
- 6 exp Ischemic Attack, Transient/ (19516)
- 7 1 or 2 or 3 or 4 or 5 or 6 (338872)
- 8 Pregnancy/ (826941)
- 9 exp Postpartum Period/ (59385)
- 10 exp Pregnancy Complications/ (400048)
- 11 exp Puerperal Disorders/ (31575)
- 12 exp Pregnancy Complications, Cardiovascular/ (16596)
- 13 8 or 9 or 10 or 11 or 12 (875082)

- 14 exp Follow-Up Studies/ (599539)
- 15 exp RECURRENCE/ (172247)
- 16 exp Pregnancy Outcome/ (51470)
- 17 14 or 15 or 16 (789904)
- 18 7 and 13 and 17 (683)
- 19 limit 18 to (english language and humans and yr="1980 -Current") (580)
- 20 exp ADULT/ (6648550)
- 21 19 and 20 (344)

CINAHL

| #  | Query                                                                                                                                                                                                        | Limiters/Expanders | Last Run Via                  | Results                                  |
|----|--------------------------------------------------------------------------------------------------------------------------------------------------------------------------------------------------------------|--------------------|-------------------------------|------------------------------------------|
| S4 | S1 AND S2 AND S3                                                                                                                                                                                             |                    | Search modes - Boolean/Phrase | Interface -                              |
|    | EBSCOhost Research Databases                                                                                                                                                                                 |                    |                               |                                          |
|    | Search Screen - Advanced Search                                                                                                                                                                              |                    |                               |                                          |
|    | Database - CINAHL                                                                                                                                                                                            | 122                |                               |                                          |
| S3 | follow up study OR recurrence OR pregnancy outcomes                                                                                                                                                          |                    | Search modes - Boolean/Phrase | Interface - EBSCOhost Research Databases |
|    | Search Screen - Advanced Search                                                                                                                                                                              |                    |                               |                                          |
|    | Database - CINAHL                                                                                                                                                                                            | 69,870             |                               |                                          |
| S2 | pregnancy OR postpartum period OR pregnancy complications OR puerperium                                                                                                                                      |                    | Search modes - Boolean/Phrase | Interface - EBSCOhost Research Databases |
|    | Search Screen - Advanced Search                                                                                                                                                                              |                    |                               |                                          |
|    | Database - CINAHL                                                                                                                                                                                            | 128,359            |                               |                                          |
| S1 | stroke OR cerebrovascular disorders OR intracerebral hemorrhage OR ischemic stroke OR transient ischemic attack OR cerebral venous thrombosis OR cerebral venous sinus thrombosis OR subarachnoid hemorrhage |                    | Search modes - Boolean/Phrase | Interface - EBSCOhost Research Databases |
|    | Search Screen - Advanced Search                                                                                                                                                                              |                    |                               |                                          |
|    | Database - CINAHL                                                                                                                                                                                            | 74,920             |                               |                                          |

## Cochrane Library

| ID  | Search                                                                       | Hits  |
|-----|------------------------------------------------------------------------------|-------|
| #8  | MeSH descriptor: [Pregnancy] explode all trees                               | 6926  |
| #9  | MeSH descriptor: [Postpartum Period] explode all trees                       | 1414  |
| #10 | MeSH descriptor: [Pregnancy Complications] explode all trees                 | 9894  |
| #11 | MeSH descriptor: [Puerperal Disorders] explode all trees                     | 1421  |
| #12 | MeSH descriptor: [Pregnancy Complications, Cardiovascular] explode all trees | 322   |
| #13 | #8 or #9 or #10 or #11 or #12                                                | 14749 |
| #14 | MeSH descriptor: [Follow-Up Studies] explode all trees                       | 55464 |
| #15 | MeSH descriptor: [Recurrence] explode all trees                              | 11246 |
| #16 | MeSH descriptor: [Pregnancy Outcome] explode all trees                       | 2992  |
| #17 | #14 or #15 or #16                                                            | 66483 |
| #23 | MeSH descriptor: [Stroke] explode all trees                                  | 7761  |
| #25 | MeSH descriptor: [Cerebral Hemorrhage] explode all trees                     | 885   |
| #26 | MeSH descriptor: [Subarachnoid Hemorrhage] explode all trees                 | 520   |
| #27 | MeSH descriptor: [Ischemic Attack, Transient] explode all trees              | 648   |
| #28 | MeSH descriptor: [Intracranial Thrombosis] explode all trees                 | 47    |
| #29 | MeSH descriptor: [Cerebrovascular Disorders] explode all trees               | 12696 |
| #30 | #23 or #25 or #26 or #27 or #28 or #29                                       | 12696 |
| #31 | #30 and #13 and #17                                                          | 27    |
